# Supplementary material for: Causal inference using observational intensive care unit data: a scoping review and recommendations for future practice
Source: PubMed Central journal article supplement (PMC10682453; doi:10.1038/s41746-023-00961-1), 2023-11-27
Supplement: 41746_2023_961_MOESM1_ESM.pdf [file 41746_2023_961_MOESM1_ESM.pdf]

## Supplementary Information

Causal inference using observational intensive care unit data: a scoping review

and recommendations for future practice

J. M. Smit<sup>1,2</sup>, J. H. Krijthe<sup>2</sup>, W.M.R. Kant<sup>3</sup>, J.A. Labrecque<sup>4</sup>, M. Komorowski<sup>5,6</sup>, D.A.M.P.J.

Gommers<sup>1</sup>, J. van Bommel<sup>1</sup>, M. J. T. Reinders<sup>2</sup>, M.E. van Genderen<sup>1</sup>

<sup>1</sup> Department of Intensive Care, Erasmus University Medical Center, Rotterdam, The Netherlands

<sup>2</sup> Bioinformatics Pattern Recognition & group, EEMCS, Delft University of Technology, Delft, The Netherlands

<sup>3</sup> Data Science group, Institute for Computing and Information Sciences, Radboud University, Nijmegen, The Netherlands

<sup>4</sup> Department of Epidemiology, Erasmus Medical Center, Rotterdam, Netherlands

<sup>5</sup> Department of Surgery and Cancer, Faculty of Medicine, Imperial College London, London, UK

<sup>6</sup> Intensive Care Unit, Charing Cross Hospital, Imperial College Healthcare NHS Trust, London, UK

## Supplementary Tables

**Supplementary Table 1:** Commonly used terms (not synonyms) to describe similar concepts typically used in research using G methods and reinforcement learning methods.

| <b>G methods</b>                                     | <b>Reinforcement learning</b> | <b>Other commonly used terms</b>                                                      |
|------------------------------------------------------|-------------------------------|---------------------------------------------------------------------------------------|
| Treatment                                            | Action                        | Exposure, intervention                                                                |
| Outcome                                              | Reward                        |                                                                                       |
| (Treatment) regime                                   | Policy                        | strategy, regimen, decision rule, joint exposures, sustained strategy, plan, protocol |
| Structural causal model                              | Environment model             | World model                                                                           |
| (Conditional) exchangeability                        | Unconfoundedness              | Ignorability, no unmeasured/residual confounding                                      |
| Positivity                                           | Feasibility                   | Experimental treatment assignment, common support, overlap                            |
| Treatment effect estimation using observational data | Off-policy evaluation         |                                                                                       |

**Supplementary Table 2:** List with collected items per study. ICU=intensive care unit, IPTW=inverse=probability-of-treatment weighting, TMLE=targeted minimum loss-based estimation, RL=reinforcement learning, NA=not applicable, NIV=non-invasive ventilation, MV=mechanical ventilation, VFD=ventilator-free day, AKI=acute kidney injury, RRT=renal replacement therapy.

| <i>Reference</i>       | <b>Studied treatment</b>        | <b>Primary outcome</b>               | <b>Number of included ICUs</b> | <b>Usage of open source databases</b> | <b>Study size (n patients)</b> | <b>Studied Treatment regime type</b> | <b>Used method</b>   |
|------------------------|---------------------------------|--------------------------------------|--------------------------------|---------------------------------------|--------------------------------|--------------------------------------|----------------------|
| <i>Agodi 2017</i>      | Protocol compliance             | Hospital-acquired complications      | 17                             | None                                  | 1,840                          | Static                               | parametric G formula |
| <i>Althoff 2020</i>    | NIV                             | Need for MV                          | 682                            | None                                  | 53,654                         | Static                               | IPTW                 |
| <i>Amer 2021</i>       | Anti-inflammatory drugs         | VFDs                                 | 168                            | None                                  | 860                            | Static                               | IPTW                 |
| <i>Arabi 2018</i>      | Anti-inflammatory drugs         | Mortality                            | 14                             | None                                  | 309                            | Static                               | IPTW                 |
| <i>Arabi 2020</i>      | Antimicrobials                  | Mortality                            | 14                             | None                                  | 349                            | Static                               | IPTW                 |
| <i>Arnaud 2020</i>     | Antimicrobials                  | AKI                                  | 1                              | MIMIC-III                             | 26,865                         | Static                               | IPTW                 |
| <i>Bailly 2015</i>     | Antimicrobials                  | Mortality                            | 87                             | None                                  | 647                            | Static                               | IPTW                 |
| <i>Bekaert 2011</i>    | Hospital-acquired complications | Mortality                            | 32                             | None                                  | 4,479                          | Static                               | IPTW                 |
| <i>Bologheanu 2023</i> | Anti-inflammatory drugs         | Mortality                            | 1                              | AmsterdamUMCdb                        | 2,946                          | Dynamic                              | RL                   |
| <i>Chen 2021</i>       | Anti-inflammatory drugs         | Mortality                            | 1                              | None                                  | 428                            | Static                               | IPTW                 |
| <i>Cheng 2019</i>      | Ordering of labs                | Combined                             | 1                              | MIMIC-III                             | 6,060                          | Dynamic                              | RL                   |
| <i>De Bus 2020</i>     | Antimicrobials                  | Clinical cure                        | 152                            | None                                  | 1,495                          | Static                               | IPTW                 |
| <i>Delaney 2016</i>    | Anti-inflammatory drugs         | Mortality                            | 51                             | None                                  | 607                            | Static                               | IPTW                 |
| <i>Dupuis 2017</i>     | Blood transfusion               | Mortality                            | 23                             | None                                  | 6,016                          | Static                               | IPTW                 |
| <i>Eghbali 2021</i>    | Sedatives & analgesics          | Maintenance of clinical target value | 1                              | MIMIC-IV                              | 1,757                          | Dynamic                              | RL                   |
| <i>Esperatti 2013</i>  | Multiple                        | Mortality                            | 6                              | None                                  | 335                            | Static                               | IPTW                 |
| <i>Frencken 2018</i>   | Bacterial colonization          | Hospital-acquired complications      | 1                              | None                                  | 2,066                          | Static                               | IPTW                 |
| <i>Guo 2022</i>        | Multiple                        | Mortality                            | 1                              | MIMIC-III                             | 13,762                         | Dynamic                              | RL                   |
| <i>Huang 2022</i>      | Sodium bicarbonate              | Mortality                            | 1                              | MIMIC-IV                              | 869                            | Static                               | IPTW                 |
| <i>Jeter 2021</i>      | Vasopressors & IV fluids        | Combined                             | 1                              | MIMIC-III                             | 5,366                          | Dynamic                              | RL                   |

|                            |                                 |                                         |                |                  |                |         |                      |
|----------------------------|---------------------------------|-----------------------------------------|----------------|------------------|----------------|---------|----------------------|
| <i>Kaushik 2022</i>        | Vasopressors & IV fluids        | Combined                                | 1              | MIMIC-III        | 17,898         | Dynamic | RL                   |
| <i>Khanal 2012</i>         | RRT                             | Mortality                               | 1              | None             | 146            | Static  | IPTW                 |
| <i>Klouwenberg 2014</i>    | Hospital-acquired complications | Mortality                               | 1              | None             | 1,112          | Static  | IPTW                 |
| <i>Komorowski 2018</i>     | Vasopressors & IV fluids        | Mortality                               | 209            | MIMIC-III + eICU | 96,156         | Dynamic | RL                   |
| <i>Kondrup 2022</i>        | MV                              | Combined                                | 1              | MIMIC-III        | 61,532         | Dynamic | RL                   |
| <i>Li 2019</i>             | gastric acid-suppressing agents | Hospital-acquired complications         | 1              | None             | 6,133          | Static  | parametric G formula |
| <i>Li 2020</i>             | Anti-inflammatory drugs         | Mortality                               | 10             | None             | 294            | Static  | IPTW                 |
| <i>Libório 2020</i>        | Diuretics                       | Mortality                               | 1              | MIMIC-III        | 14,896         | Static  | IPTW                 |
| <i>Lin 2018</i>            | Anticoagulants                  | Maintenance of clinical target value    | 2              | MIMIC-III        | 4,908          | Dynamic | RL                   |
| <i>Liu 2016</i>            | Multiple                        | Vital signs                             | 1              | None             | 300            | Static  | parametric G formula |
| <i>Lopez-Martinez 2019</i> | Sedatives & analgesics          | Combined                                | 1              | MIMIC-III        | 6,843          | Dynamic | RL                   |
| <i>Martucci 2023</i>       | Blood transfusion               | Mortality                               | 41             | None             | 604            | Dynamic | IPTW                 |
| <i>Mecklenburg 2021</i>    | therapeutic hypothermia (TH)    | Major bleeding                          | 1              | None             | 66             | Static  | IPTW                 |
| <i>Mollura 2022</i>        | Vasopressors & IV fluids        | Mortality                               | 1              | MIMIC-III        | 20,496         | Dynamic | RL                   |
| <i>Moromizato 2023</i>     | Anti-inflammatory drugs         | Mortality                               | 438            | None             | 67,348         | Static  | IPTW                 |
| <i>Morzywołek 2022</i>     | RRT                             | Mortality                               | 1              | None             | 13,403         | Dynamic | IPTW                 |
| <i>Muriel 2015</i>         | Sedatives & analgesics          | Need for MV                             | 322            | None             | 842            | Static  | IPTW                 |
| <i>Nemati 2016</i>         | Anticoagulants                  | Maintenance of clinical target value    | 1              | MIMIC-II         | 4,470          | Dynamic | RL                   |
| <i>Ohbe 2018</i>           | Nutrition                       | Mortality                               | 1200           | None             | 1,769          | Static  | IPTW                 |
| <i>Ong 2015</i>            | Hospital-acquired complications | Mortality                               | 2              | None             | 3,080          | Static  | IPTW                 |
| <i>Ong 2016</i>            | Hospital-acquired complications | Mortality                               | 2              | None             | 399            | Static  | IPTW                 |
| <i>Padmanabhan 2015</i>    | Sedatives & analgesics          | Deviation from vital signs target value | simulated data | None             | simulated data | Dynamic | RL                   |
| <i>Padmanabhan 2017</i>    | Sedatives & analgesics          | Maintenance of clinical target value    | simulated data | None             | simulated data | Dynamic | RL                   |
| <i>Peine 2021</i>          | MV                              | Mortality                               | 209            | MIMIC-III + eICU | 37,029         | Dynamic | RL                   |

|                       |                                 |                                      |                |                            |                |         |                      |
|-----------------------|---------------------------------|--------------------------------------|----------------|----------------------------|----------------|---------|----------------------|
| <i>Peng 2018</i>      | Vasopressors & IV fluids        | Mortality                            | 1              | MIMIC-III                  | 15,415         | Dynamic | RL                   |
| <i>Peng 2023</i>      | tracheostomy                    | Mortality                            | 209            | MIMIC-IV + eICU            | 626            | Static  | IPTW                 |
| <i>Petersen 2019</i>  | Anti-inflammatory drugs         | Mortality                            | simulated data | None                       | simulated data | Dynamic | RL                   |
| <i>Pisani 2015</i>    | antipsychotic                   | Delirium                             | 1              | None                       | 93             | Static  | IPTW                 |
| <i>Pouwels 2017</i>   | Hospital-acquired complications | Mortality                            | 2              | None                       | 3,411          | Static  | IPTW                 |
| <i>Pouwels 2018</i>   | Hospital-acquired complications | Mortality                            | 2              | None                       | 2,914          | Static  | IPTW                 |
| <i>Pouwels 2020</i>   | Hospital-acquired complications | ICU LOS                              | 2              | None                       | 2,914          | Static  | IPTW                 |
| <i>Prasad 2017</i>    | MV                              | Combined                             | 1              | MIMIC-III                  | 8,182          | Dynamic | RL                   |
| <i>Prasad 2022</i>    | Electrolyte replacement therapy | Combined                             | 4              | MIMIC-IV                   | 53,234         | Dynamic | RL                   |
| <i>Raghu 2017</i>     | Vasopressors & IV fluids        | Combined                             | 1              | MIMIC-III                  | 17,898         | Dynamic | RL                   |
| <i>Raghu 2018</i>     | Vasopressors & IV fluids        | Combined                             | 1              | MIMIC-III                  | 17,898         | Dynamic | RL                   |
| <i>Ribba 2022</i>     | Sedatives & analgesics          | Maintenance of clinical target value | simulated data | None                       | simulated data | Dynamic | RL                   |
| <i>Roggeveen 2021</i> | Vasopressors & IV fluids        | Mortality                            | 2              | MIMIC-III + AmsterdamUMCdb | 11,382         | Dynamic | RL                   |
| <i>Shahn 2020</i>     | IV fluids                       | Mortality                            | 1              | MIMIC-III                  | 1,639          | Dynamic | IPTW                 |
| <i>Shahn 2021</i>     | Diuretics                       | Mortality                            | 1              | MIMIC-III                  | 1,501          | Dynamic | IPTW                 |
| <i>Shahn 2023</i>     | MV                              | Mortality                            | 1              | MIMIC-IV                   | 7,433          | Dynamic | IPTW                 |
| <i>Sinzinger 2005</i> | Sedatives & analgesics          | Maintenance of clinical target value | simulated data | None                       | simulated data | Dynamic | RL                   |
| <i>Steen 2021</i>     | Hospital-acquired complications | Mortality                            | 1              | None                       | 2,720          | Static  | IPTW                 |
| <i>Su 2022</i>        | IV fluids                       | Mortality                            | 1              | None                       | 2,705          | Dynamic | RL                   |
| <i>Tacquard 2021</i>  | Anticoagulants                  | Thrombotic complications             | 8              | None                       | 538            | Static  | IPTW                 |
| <i>Torres 2020</i>    | ARDS                            | Mortality                            | 3              | None                       | 658            | Static  | TMLE                 |
| <i>Truche 2016</i>    | RRT                             | Mortality                            | 19             | None                       | 1,360          | Static  | IPTW                 |
| <i>Urner 2022</i>     | ECMO                            | Mortality                            | 310            | None                       | 7,345          | Dynamic | IPTW                 |
| <i>Wang 2011</i>      | MV                              | Mortality                            | 10             | None                       | 1,410          | Dynamic | parametric G formula |
| <i>Wang, Y. 2022</i>  | Blood transfusion               | Combined                             | 2              | MIMIC-III                  | 17,608         | Dynamic | RL                   |
| <i>Wang, Z. 2022</i>  | Vasopressors & IV fluids        | Combined                             | 1              | MIMIC-IV                   | 6,660          | Dynamic | RL                   |
| <i>Weng 2017</i>      | Glucose levels                  | Mortality                            | 1              | MIMIC-III                  | 5,565          | Dynamic | RL                   |
| <i>Yang 2022</i>      | Dry weight                      | Combined                             | 1              | None                       | 750            | Dynamic | RL                   |

|                |                          |           |     |                           |        |         |                      |
|----------------|--------------------------|-----------|-----|---------------------------|--------|---------|----------------------|
| Yarnell 2023   | MV                       | Mortality | 2   | MIMIC-IV + AmsterdamUMCdb | 4,636  | Dynamic | parametric G formula |
| Zhang, L. 2021 | Anti-inflammatory drugs  | Mortality | 208 | eICU                      | 1,557  | Static  | IPTW                 |
| Zhang, Q. 2023 | Vasopressors & IV fluids | Combined  | 1   | MIMIC-III                 | 19,620 | Dynamic | RL                   |
| Zhang, R. 2021 | Diuretics                | Mortality | 20  | None                      | 932    | Static  | IPTW                 |
| Zhang, Z. 2018 | Sodium bicarbonate       | Mortality | 1   | MIMIC-III                 | 1,718  | Static  | IPTW                 |
| Zhang, Z. 2019 | Sodium bicarbonate       | Mortality | 1   | MIMIC-III                 | 3,406  | Static  | IPTW                 |
| Zheng 2021     | NIV                      | Mortality | 1   | None                      | 1,372  | Dynamic | RL                   |

**Supplementary Table 3:** Subcomponent-specific results of the quality of reporting assessment in the reproducibility domain, specifically for the studies inverse-probability-of-treatment weighting or targeted minimum loss-based estimation (n=43).

| Reference        | Eligibility criteria | Treatment strategies | Outcome | Follow-up period |                  |                 | Analysis plan              |                             |
|------------------|----------------------|----------------------|---------|------------------|------------------|-----------------|----------------------------|-----------------------------|
|                  |                      |                      |         | Time zero        | End of follow-up | Time resolution | Propensity score estimator | Propensity score predictors |
| Althoff 2020     | 😊                    | 😊                    | 😊       | 😊                | 😊                | 😞               | 😞                          | 😊                           |
| Amer 2021        | 😊                    | 😞                    | 😊       | 😊                | 😊                | 😊               | 😊                          | 😊                           |
| Arabi 2018       | 😊                    | 😞                    | 😊       | 😊                | 😊                | 😊               | 😞                          | 😊                           |
| Arabi 2020       | 😊                    | 😞                    | 😊       | 😊                | 😊                | 😊               | 😞                          | 😊                           |
| Arnaud 2020      | 😊                    | 😞                    | 😊       | 😊                | 😊                | 😊               | 😊                          | 😊                           |
| Bailly 2015      | 😊                    | 😊                    | 😊       | 😊                | 😊                | 😊               | 😊                          | 😊                           |
| Bekaert 2011     | 😊                    | 😊                    | 😊       | 😊                | 😊                | 😊               | 😊                          | 😊                           |
| Chen 2021        | 😊                    | 😞                    | 😊       | 😊                | 😊                | 😊               | 😞                          | 😊                           |
| De Bus 2020      | 😊                    | 😊                    | 😊       | 😊                | 😊                | 😊               | 😊                          | 😊                           |
| Delaney 2016     | 😊                    | 😞                    | 😊       | 😊                | 😊                | 😊               | 😊                          | 😊                           |
| Dupuis 2017      | 😊                    | 😊                    | 😊       | 😊                | 😞                | 😊               | 😊                          | 😊                           |
| Esperatti 2013   | 😊                    | 😞                    | 😊       | 😊                | 😊                | 😞               | 😊                          | 😊                           |
| Frencken 2018    | 😊                    | 😊                    | 😊       | 😊                | 😊                | 😊               | 😞                          | 😊                           |
| Huang 2022       | 😊                    | 😊                    | 😊       | 😊                | 😊                | 😞               | 😞                          | 😊                           |
| Khanal 2012      | 😊                    | 😊                    | 😊       | 😞                | 😊                | 😊               | 😊                          | 😊                           |
| Klouwenberg 2014 | 😊                    | 😊                    | 😊       | 😊                | 😊                | 😊               | 😊                          | 😊                           |
| Li 2020          | 😊                    | 😞                    | 😊       | 😊                | 😊                | 😊               | 😞                          | 😊                           |
| Libório 2020     | 😊                    | 😞                    | 😊       | 😊                | 😊                | 😊               | 😊                          | 😊                           |
| Martucci 2023    | 😊                    | 😊                    | 😊       | 😊                | 😊                | 😊               | 😞                          | 😊                           |
| Mecklenburg 2021 | 😊                    | 😊                    | 😊       | 😊                | 😊                | 😊               | 😊                          | 😊                           |
| Moromizato 2023  | 😊                    | 😊                    | 😊       | 😊                | 😊                | 😊               | 😞                          | 😞                           |

|                 |   |   |   |   |   |   |   |   |   |
|-----------------|---|---|---|---|---|---|---|---|---|
| Morzywołek 2022 | 😊 | 😊 | 😊 | 😊 | 😊 | 😊 | 😊 | 😊 | 😊 |
| Muriel 2015     | 😊 | 😊 | 😊 | 😊 | 😊 | 😊 | 😊 | 😊 | 😊 |
| Ohbe 2018       | 😊 | 😊 | 😊 | 😊 | 😊 | 😊 | 😊 | 😊 | 😊 |
| Ong 2015        | 😊 | 😊 | 😊 | 😊 | 😊 | 😊 | 😊 | 😊 | 😊 |
| Ong 2016        | 😊 | 😊 | 😊 | 😊 | 😊 | 😊 | 😊 | 😊 | 😊 |
| Peng 2023       | 😊 | 😊 | 😊 | 😊 | 😞 | 😊 | 😞 | 😊 | 😊 |
| Pisani 2015     | 😊 | 😊 | 😊 | 😊 | 😊 | 😊 | 😊 | 😊 | 😊 |
| Pouwels 2017    | 😊 | 😊 | 😊 | 😊 | 😊 | 😊 | 😊 | 😊 | 😊 |
| Pouwels 2018    | 😊 | 😊 | 😊 | 😊 | 😊 | 😊 | 😊 | 😊 | 😊 |
| Pouwels 2020    | 😊 | 😊 | 😊 | 😊 | 😊 | 😊 | 😊 | 😊 | 😊 |
| Shahn 2020      | 😊 | 😊 | 😊 | 😊 | 😊 | 😊 | 😊 | 😊 | 😊 |
| Shahn 2021      | 😊 | 😊 | 😊 | 😊 | 😊 | 😊 | 😊 | 😊 | 😊 |
| Shahn 2023      | 😊 | 😊 | 😊 | 😊 | 😊 | 😊 | 😊 | 😊 | 😊 |
| Steen 2021      | 😊 | 😊 | 😊 | 😊 | 😊 | 😊 | 😊 | 😊 | 😊 |
| Tacquard 2021   | 😊 | 😊 | 😊 | 😊 | 😊 | 😊 | 😊 | 😞 | 😊 |
| Torres 2020     | 😊 | 😊 | 😊 | 😊 | 😊 | 😊 | 😊 | 😊 | 😊 |
| Truche 2016     | 😊 | 😊 | 😊 | 😊 | 😊 | 😊 | 😊 | 😊 | 😊 |
| Urner 2022      | 😊 | 😊 | 😊 | 😊 | 😊 | 😊 | 😊 | 😞 | 😊 |
| Zhang, L. 2021  | 😊 | 😞 | 😊 | 😊 | 😊 | 😊 | 😊 | 😊 | 😊 |
| Zhang, R. 2021  | 😊 | 😊 | 😊 | 😊 | 😊 | 😊 | 😊 | 😞 | 😞 |
| Zhang, Z. 2018  | 😊 | 😊 | 😊 | 😊 | 😊 | 😊 | 😊 | 😞 | 😊 |
| Zhang, Z. 2019  | 😊 | 😞 | 😊 | 😊 | 😊 | 😊 | 😊 | 😊 | 😊 |

**Supplementary Table 4:** Subcomponent-specific results of the quality of reporting assessment in the reproducibility domain, specifically for the studies using the parametric G formula (n=5).

| Reference    | Eligibility criteria | Treatment strategies | Outcome | Follow-up period |                  | Analysis plan (parametric G formula) |                   |                    |                        |                        |                                  |
|--------------|----------------------|----------------------|---------|------------------|------------------|--------------------------------------|-------------------|--------------------|------------------------|------------------------|----------------------------------|
|              |                      |                      |         | Time zero        | End of follow-up | Time resolution                      | Outcome estimator | Outcome predictors | Confounders estimators | Confounders predictors | Method to evaluate the G formula |
| Agodi 2017   | 😊                    | 😊                    | 😊       | 😊                | 😊                | 😊                                    | 😊                 | 😊                  | 😊                      | 😊                      | 😊                                |
| Li 2019      | 😊                    | 😊                    | 😊       | 😊                | 😊                | 😊                                    | 😊                 | 😊                  | 😊                      | 😊                      | 😊                                |
| Liu 2016     | 😊                    | 😊                    | 😊       | 😊                | 😊                | 😊                                    | 😊                 | 😊                  | 😞                      | 😞                      | 😞                                |
| Wang 2011    | 😊                    | 😊                    | 😊       | 😊                | 😊                | 😊                                    | 😊                 | 😊                  | 😊                      | 😊                      | 😊                                |
| Yarnell 2023 | 😊                    | 😊                    | 😊       | 😊                | 😊                | 😊                                    | 😊                 | 😊                  | 😊                      | 😊                      | 😊                                |

**Supplementary Table 5:** Subcomponent-specific results of the quality of reporting assessment in the reproducibility domain, specifically for the studies using reinforcement learning (n=31). NA=not applicable

| Reference           | Eligibility criteria | Treatment strategies | Outcome | Follow-up period |                  |                 | Analysis plan (RL) |                   |                   |                 |
|---------------------|----------------------|----------------------|---------|------------------|------------------|-----------------|--------------------|-------------------|-------------------|-----------------|
|                     |                      |                      |         | Time zero        | End of follow-up | Time resolution | Learning scheme    | State space model | Environment model | Discount factor |
| Bologheanu 2023     | 😊                    | 😊                    | 😞       | 😊                | 😊                | 😊               | 😊                  | 😊                 | 😊                 | 😊               |
| Cheng 2019          | 😊                    | 😊                    | 😊       | 😊                | 😊                | 😊               | 😊                  | 😊                 | 😊                 | 😊               |
| Eghbali 2021        | 😊                    | 😊                    | 😊       | 😊                | 😊                | 😊               | 😊                  | 😊                 | 😊                 | 😊               |
| Guo 2022            | 😊                    | 😊                    | 😊       | 😊                | 😊                | 😊               | 😊                  | 😊                 | 😊                 | 😊               |
| Jeter 2021          | 😊                    | 😊                    | 😊       | 😊                | 😊                | 😊               | 😊                  | 😊                 | 😊                 | 😞               |
| Kaushik 2022        | 😊                    | 😊                    | 😊       | 😞                | 😊                | 😊               | 😊                  | 😊                 | 😊                 | 😞               |
| Komorowski 2018     | 😊                    | 😊                    | 😊       | 😊                | 😊                | 😊               | 😊                  | 😊                 | 😊                 | 😊               |
| Kondrup 2022        | 😞                    | 😊                    | 😊       | 😊                | 😊                | 😊               | 😊                  | 😊                 | 😊                 | 😊               |
| Lin 2018            | 😊                    | 😊                    | 😊       | 😞                | 😞                | 😊               | 😊                  | 😞                 | 😊                 | 😞               |
| Lopez-Martinez 2019 | 😊                    | 😊                    | 😊       | 😞                | 😞                | 😊               | 😊                  | 😊                 | 😊                 | 😞               |
| Mollura 2022        | 😊                    | 😞                    | 😊       | 😊                | 😊                | 😊               | 😊                  | 😊                 | 😊                 | 😊               |
| Nemati 2016         | 😊                    | 😊                    | 😊       | 😊                | 😊                | 😊               | 😊                  | 😊                 | 😊                 | 😞               |
| Padmanabhan 2015    | 😊                    | 😊                    | 😊       | NA               | NA               | NA              | 😊                  | 😊                 | 😊                 | 😞               |
| Padmanabhan 2017    | 😊                    | 😊                    | 😊       | NA               | NA               | NA              | 😊                  | 😊                 | 😊                 | 😞               |
| Peine 2021          | 😊                    | 😊                    | 😊       | 😊                | 😊                | 😊               | 😊                  | 😊                 | 😊                 | 😊               |
| Peng 2018           | 😊                    | 😊                    | 😊       | 😞                | 😞                | 😊               | 😊                  | 😊                 | 😊                 | 😊               |
| Petersen 2019       | 😊                    | 😊                    | 😊       | NA               | NA               | NA              | 😊                  | 😊                 | 😊                 | 😊               |
| Prasad 2017         | 😊                    | 😊                    | 😊       | 😊                | 😊                | 😊               | 😊                  | 😊                 | 😊                 | 😞               |
| Prasad 2022         | 😊                    | 😊                    | 😊       | 😊                | 😊                | 😊               | 😊                  | 😞                 | 😊                 | 😞               |
| Raghu 2017          | 😊                    | 😊                    | 😊       | 😊                | 😊                | 😊               | 😊                  | 😊                 | 😊                 | 😞               |
| Raghu 2018          | 😊                    | 😊                    | 😊       | 😊                | 😊                | 😊               | 😊                  | 😞                 | 😊                 | 😞               |
| Ribba 2022          | 😊                    | 😞                    | 😊       | NA               | NA               | NA              | 😊                  | 😊                 | 😊                 | 😊               |
| Roggeveen 2021      | 😊                    | 😊                    | 😊       | 😊                | 😊                | 😊               | 😊                  | 😊                 | 😊                 | 😞               |
| Sinzinger 2005      | 😊                    | 😊                    | 😊       | NA               | NA               | NA              | 😊                  | 😊                 | 😊                 | 😊               |
| Su 2022             | 😊                    | 😊                    | 😊       | 😞                | 😊                | 😊               | 😊                  | 😞                 | 😊                 | 😞               |
| Wang, Y. 2022       | 😊                    | 😊                    | 😊       | 😊                | 😊                | 😊               | 😊                  | 😊                 | 😊                 | 😊               |
| Wang, Z. 2022       | 😊                    | 😊                    | 😊       | 😊                | 😊                | 😊               | 😊                  | 😊                 | 😊                 | 😞               |
| Weng 2017           | 😊                    | 😞                    | 😊       | 😞                | 😞                | 😊               | 😊                  | 😞                 | 😞                 | 😊               |
| Yang 2022           | 😊                    | 😊                    | 😊       | 😊                | 😊                | 😞               | 😊                  | 😊                 | 😊                 | 😊               |
| Zhang, Q. 2023      | 😊                    | 😊                    | 😊       | 😊                | 😊                | 😊               | 😊                  | 😊                 | 😊                 | 😞               |
| Zheng 2021          | 😊                    | 😊                    | 😊       | 😊                | 😊                | 😞               | 😊                  | 😞                 | 😊                 | 😊               |



**Supplementary Table 6:** reporting of assumptions assessment results per study.

IPT=inverse probability of treatment

| Reference           | Conditional exchangeability |                                         | Positivity    |           | Consistency                                                                        |           |
|---------------------|-----------------------------|-----------------------------------------|---------------|-----------|------------------------------------------------------------------------------------|-----------|
|                     | Mentioned                   | Check for potential violations reported |               | Mentioned | Check for potential violations reported<br>Examination of IPT weights distribution | Mentioned |
|                     |                             | Indirect method                         | Bias analysis |           |                                                                                    |           |
| Agodi 2017          | ☺                           | ☹                                       | ☹             | ☹         | ☹                                                                                  | ☹         |
| Althoff 2020        | ☺                           | ☺                                       | ☺             | ☹         | ☹                                                                                  | ☹         |
| Amer 2021           | ☺                           | ☹                                       | ☹             | ☹         | ☹                                                                                  | ☹         |
| Arabi 2018          | ☺                           | ☺                                       | ☹             | ☹         | ☹                                                                                  | ☹         |
| Arabi 2020          | ☺                           | ☺                                       | ☹             | ☹         | ☹                                                                                  | ☹         |
| Arnaud 2020         | ☺                           | ☹                                       | ☹             | ☹         | ☺                                                                                  | ☹         |
| Bailly 2015         | ☺                           | ☺                                       | ☹             | ☺         | ☺                                                                                  | ☺         |
| Bekaert 2011        | ☺                           | ☹                                       | ☹             | ☹         | ☹                                                                                  | ☹         |
| Bologheanu 2023     | ☹                           | ☹                                       | ☹             | ☹         | ☹                                                                                  | ☹         |
| Chen 2021           | ☺                           | ☹                                       | ☹             | ☹         | ☺                                                                                  | ☹         |
| Cheng 2019          | ☹                           | ☹                                       | ☹             | ☹         | ☹                                                                                  | ☹         |
| De Bus 2020         | ☺                           | ☺                                       | ☹             | ☺         | ☺                                                                                  | ☹         |
| Delaney 2016        | ☺                           | ☹                                       | ☹             | ☹         | ☺                                                                                  | ☹         |
| Dupuis 2017         | ☺                           | ☹                                       | ☺             | ☺         | ☺                                                                                  | ☹         |
| Eghbali 2021        | ☺                           | ☹                                       | ☹             | ☹         | ☹                                                                                  | ☹         |
| Esperatti 2013      | ☹                           | ☹                                       | ☹             | ☹         | ☹                                                                                  | ☹         |
| Frencken 2018       | ☺                           | ☹                                       | ☹             | ☹         | ☹                                                                                  | ☹         |
| Guo 2022            | ☺                           | ☹                                       | ☹             | ☹         | ☹                                                                                  | ☺         |
| Huang 2022          | ☺                           | ☹                                       | ☹             | ☹         | ☹                                                                                  | ☹         |
| Jeter 2021          | ☹                           | ☹                                       | ☹             | ☹         | ☹                                                                                  | ☹         |
| Kaushik 2022        | ☹                           | ☹                                       | ☹             | ☹         | ☹                                                                                  | ☹         |
| Khanal 2012         | ☺                           | ☹                                       | ☹             | ☺         | ☺                                                                                  | ☹         |
| Klouwenberg 2014    | ☺                           | ☺                                       | ☹             | ☹         | ☹                                                                                  | ☹         |
| Komorowski 2018     | ☹                           | ☹                                       | ☹             | ☹         | ☹                                                                                  | ☹         |
| Kondrup 2022        | ☹                           | ☹                                       | ☹             | ☹         | ☹                                                                                  | ☹         |
| Li 2019             | ☺                           | ☹                                       | ☹             | ☹         | ☹                                                                                  | ☹         |
| Li 2020             | ☹                           | ☹                                       | ☹             | ☹         | ☺                                                                                  | ☹         |
| Libório 2020        | ☺                           | ☹                                       | ☹             | ☺         | ☺                                                                                  | ☹         |
| Lin 2018            | ☺                           | ☹                                       | ☹             | ☹         | ☹                                                                                  | ☹         |
| Liu 2016            | ☺                           | ☹                                       | ☹             | ☹         | ☹                                                                                  | ☺         |
| Lopez-Martinez 2019 | ☹                           | ☹                                       | ☹             | ☹         | ☹                                                                                  | ☹         |
| Martucci 2023       | ☺                           | ☹                                       | ☹             | ☹         | ☹                                                                                  | ☹         |
| Mecklenburg 2021    | ☺                           | ☹                                       | ☹             | ☹         | ☹                                                                                  | ☹         |
| Mollura 2022        | ☹                           | ☺                                       | ☹             | ☹         | ☹                                                                                  | ☹         |
| Moromizato 2023     | ☺                           | ☹                                       | ☺             | ☹         | ☹                                                                                  | ☹         |
| Morzywótek 2022     | ☺                           | ☹                                       | ☹             | ☹         | ☺                                                                                  | ☹         |
| Muriel 2015         | ☺                           | ☹                                       | ☹             | ☹         | ☹                                                                                  | ☹         |
| Nemati 2016         | ☹                           | ☹                                       | ☹             | ☹         | ☹                                                                                  | ☹         |
| Ohbe 2018           | ☺                           | ☹                                       | ☺             | ☹         | ☹                                                                                  | ☹         |
| Ong 2015            | ☺                           | ☹                                       | ☹             | ☹         | ☹                                                                                  | ☹         |
| Ong 2016            | ☺                           | ☺                                       | ☹             | ☹         | ☹                                                                                  | ☹         |
| Padmanabhan 2015    | ☹                           | ☹                                       | ☹             | ☹         | ☹                                                                                  | ☹         |
| Padmanabhan 2017    | ☹                           | ☹                                       | ☹             | ☹         | ☹                                                                                  | ☹         |
| Peine 2021          | ☺                           | ☹                                       | ☹             | ☹         | ☹                                                                                  | ☹         |
| Peng 2018           | ☺                           | ☹                                       | ☹             | ☹         | ☺                                                                                  | ☹         |
| Peng 2023           | ☺                           | ☺                                       | ☺             | ☹         | ☹                                                                                  | ☹         |
| Petersen 2019       | ☹                           | ☹                                       | ☹             | ☹         | ☹                                                                                  | ☹         |
| Pisani 2015         | ☺                           | ☹                                       | ☹             | ☹         | ☹                                                                                  | ☹         |
| Pouwels 2017        | ☺                           | ☹                                       | ☹             | ☹         | ☺                                                                                  | ☹         |
| Pouwels 2018        | ☺                           | ☺                                       | ☹             | ☹         | ☺                                                                                  | ☹         |
| Pouwels 2020        | ☺                           | ☺                                       | ☹             | ☺         | ☺                                                                                  | ☺         |

|                |   |   |   |   |   |   |
|----------------|---|---|---|---|---|---|
| Prasad 2017    | ⊗ | ⊗ | ⊗ | ⊗ | ⊗ | ⊗ |
| Prasad 2022    | ⊙ | ⊗ | ⊗ | ⊗ | ⊗ | ⊗ |
| Raghu 2017     | ⊙ | ⊗ | ⊗ | ⊙ | ⊗ | ⊗ |
| Raghu 2018     | ⊙ | ⊗ | ⊗ | ⊗ | ⊗ | ⊗ |
| Ribba 2022     | ⊗ | ⊗ | ⊗ | ⊗ | ⊗ | ⊗ |
| Roggeveen 2021 | ⊗ | ⊗ | ⊗ | ⊗ | ⊗ | ⊗ |
| Shahn 2020     | ⊙ | ⊙ | ⊗ | ⊙ | ⊗ | ⊙ |
| Shahn 2021     | ⊙ | ⊙ | ⊗ | ⊙ | ⊙ | ⊗ |
| Shahn 2023     | ⊙ | ⊗ | ⊗ | ⊙ | ⊗ | ⊗ |
| Sinzinger 2005 | ⊗ | ⊗ | ⊗ | ⊗ | ⊗ | ⊗ |
| Steen 2021     | ⊙ | ⊗ | ⊗ | ⊙ | ⊙ | ⊙ |
| Su 2022        | ⊙ | ⊗ | ⊗ | ⊗ | ⊗ | ⊗ |
| Tacquard 2021  | ⊗ | ⊗ | ⊗ | ⊗ | ⊗ | ⊗ |
| Torres 2020    | ⊗ | ⊙ | ⊗ | ⊗ | ⊗ | ⊗ |
| Truche 2016    | ⊙ | ⊗ | ⊙ | ⊙ | ⊙ | ⊙ |
| Urner 2022     | ⊙ | ⊗ | ⊙ | ⊗ | ⊗ | ⊗ |
| Wang 2011      | ⊙ | ⊗ | ⊗ | ⊙ | ⊗ | ⊙ |
| Wang, Y. 2022  | ⊗ | ⊗ | ⊗ | ⊗ | ⊗ | ⊗ |
| Wang Z. 2022   | ⊗ | ⊗ | ⊗ | ⊗ | ⊗ | ⊗ |
| Weng 2017      | ⊗ | ⊗ | ⊗ | ⊗ | ⊗ | ⊗ |
| Yang 2022      | ⊙ | ⊗ | ⊗ | ⊗ | ⊗ | ⊗ |
| Yarnell 2023   | ⊙ | ⊗ | ⊙ | ⊙ | ⊗ | ⊙ |
| Zhang, L. 2021 | ⊗ | ⊗ | ⊗ | ⊗ | ⊗ | ⊗ |
| Zhang, Q. 2023 | ⊗ | ⊗ | ⊗ | ⊗ | ⊗ | ⊗ |
| Zhang, R. 2021 | ⊗ | ⊗ | ⊗ | ⊗ | ⊙ | ⊗ |
| Zhang, Z. 2018 | ⊙ | ⊗ | ⊗ | ⊗ | ⊙ | ⊗ |
| Zhang, Z. 2019 | ⊙ | ⊗ | ⊗ | ⊗ | ⊙ | ⊗ |
| Zheng 2021     | ⊗ | ⊗ | ⊗ | ⊗ | ⊗ | ⊗ |

**Supplementary Table 7:** filled PRISMA Extension for Scoping Reviews (PRISMA<sub>ScR</sub>) checklist.

| SECTION                           | ITEM | PRISMA-ScR CHECKLIST ITEM                                                                                                                                                                                                                                                                                  | REPORTED ON PAGE #    |
|-----------------------------------|------|------------------------------------------------------------------------------------------------------------------------------------------------------------------------------------------------------------------------------------------------------------------------------------------------------------|-----------------------|
| <b>TITLE</b>                      |      |                                                                                                                                                                                                                                                                                                            |                       |
| Title                             | 1    | Identify the report as a scoping review.                                                                                                                                                                                                                                                                   | 1                     |
| <b>ABSTRACT</b>                   |      |                                                                                                                                                                                                                                                                                                            |                       |
| Structured summary                | 2    | Provide a structured summary that includes (as applicable): background, objectives, eligibility criteria, sources of evidence, charting methods, results, and conclusions that relate to the review questions and objectives.                                                                              | 3                     |
| <b>INTRODUCTION</b>               |      |                                                                                                                                                                                                                                                                                                            |                       |
| Rationale                         | 3    | Describe the rationale for the review in the context of what is already known. Explain why the review questions/objectives lend themselves to a scoping review approach.                                                                                                                                   | 8-10                  |
| Objectives                        | 4    | Provide an explicit statement of the questions and objectives being addressed with reference to their key elements (e.g., population or participants, concepts, and context) or other relevant key elements used to conceptualize the review questions and/or objectives.                                  | 10                    |
| <b>METHODS</b>                    |      |                                                                                                                                                                                                                                                                                                            |                       |
| Protocol and registration         | 5    | Indicate whether a review protocol exists; state if and where it can be accessed (e.g., a Web address); and if available, provide registration information, including the registration number.                                                                                                             | 22                    |
| Eligibility criteria              | 6    | Specify characteristics of the sources of evidence used as eligibility criteria (e.g., years considered, language, and publication status), and provide a rationale.                                                                                                                                       | 22-23                 |
| Information sources*              | 7    | Describe all information sources in the search (e.g., databases with dates of coverage and contact with authors to identify additional sources), as well as the date the most recent search was executed.                                                                                                  | 22                    |
| Search                            | 8    | Present the full electronic search strategy for at least 1 database, including any limits used, such that it could be repeated.                                                                                                                                                                            | Supplementary Table 8 |
| Selection of sources of evidence† | 9    | State the process for selecting sources of evidence (i.e., screening and eligibility) included in the scoping review.                                                                                                                                                                                      | 23                    |
| Data charting process‡            | 10   | Describe the methods of charting data from the included sources of evidence (e.g., calibrated forms or forms that have been tested by the team before their use, and whether data charting was done independently or in duplicate) and any processes for obtaining and confirming data from investigators. | 23                    |
| Data items                        | 11   | List and define all variables for which data were sought and any assumptions and simplifications made.                                                                                                                                                                                                     | 24                    |
| Critical appraisal of individual  | 12   | If done, provide a rationale for conducting a critical appraisal of included sources of evidence;                                                                                                                                                                                                          | 24-25                 |

|                                                      |    |                                                                                                                                                                                                 |                                   |
|------------------------------------------------------|----|-------------------------------------------------------------------------------------------------------------------------------------------------------------------------------------------------|-----------------------------------|
| <b>sources of evidence§</b>                          |    | describe the methods used and how this information was used in any data synthesis (if appropriate).                                                                                             |                                   |
| <b>Synthesis of results</b>                          | 13 | Describe the methods of handling and summarizing the data that were charted.                                                                                                                    | 26                                |
| <b>RESULTS</b>                                       |    |                                                                                                                                                                                                 |                                   |
| <b>Selection of sources of evidence</b>              | 14 | Give numbers of sources of evidence screened, assessed for eligibility, and included in the review, with reasons for exclusions at each stage, ideally using a flow diagram.                    | Figure 2                          |
| <b>Characteristics of sources of evidence</b>        | 15 | For each source of evidence, present characteristics for which data were charted and provide the citations.                                                                                     | Table 2 and Supplementary Table 2 |
| <b>Critical appraisal within sources of evidence</b> | 16 | If done, present data on critical appraisal of included sources of evidence (see item 12).                                                                                                      | 11-13                             |
| <b>Results of individual sources of evidence</b>     | 17 | For each included source of evidence, present the relevant data that were charted that relate to the review questions and objectives.                                                           | Supplementary Figures 3-8         |
| <b>Synthesis of results</b>                          | 18 | Summarize and/or present the charting results as they relate to the review questions and objectives.                                                                                            | Figure 3                          |
| <b>DISCUSSION</b>                                    |    |                                                                                                                                                                                                 |                                   |
| <b>Summary of evidence</b>                           | 19 | Summarize the main results (including an overview of concepts, themes, and types of evidence available), link to the review questions and objectives, and consider the relevance to key groups. | 13-15                             |
| <b>Limitations</b>                                   | 20 | Discuss the limitations of the scoping review process.                                                                                                                                          | 21                                |
| <b>Conclusions</b>                                   | 21 | Provide a general interpretation of the results with respect to the review questions and objectives, as well as potential implications and/or next steps.                                       | 22                                |
| <b>FUNDING</b>                                       |    |                                                                                                                                                                                                 |                                   |
| <b>Funding</b>                                       | 22 | Describe sources of funding for the included sources of evidence, as well as sources of funding for the scoping review. Describe the role of the funders of the scoping review.                 | 26                                |

JBI = Joanna Briggs Institute; PRISMA-ScR = Preferred Reporting Items for Systematic reviews and Meta-Analyses extension for Scoping Reviews.

\* Where *sources of evidence* (see second footnote) are compiled from, such as bibliographic databases, social media platforms, and Web sites.

† A more inclusive/heterogeneous term used to account for the different types of evidence or data sources (e.g., quantitative and/or qualitative research, expert opinion, and policy documents) that may be eligible in a scoping review as opposed to only studies. This is not to be confused with *information sources* (see first footnote).

‡ The frameworks by Arksey and O'Malley (6) and Levac and colleagues (7) and the JBI guidance (4, 5) refer to the process of data extraction in a scoping review as data charting.

§ The process of systematically examining research evidence to assess its validity, results, and relevance before using it to inform a decision. This term is used for items 12 and 19 instead of "risk of bias" (which is more applicable to systematic reviews of interventions) to include and acknowledge the various sources of evidence that may be used in a scoping review (e.g., quantitative and/or qualitative research, expert opinion, and policy document).

From: Tricco AC, Lillie E, Zarin W, O'Brien KK, Colquhoun H, Levac D, et al. PRISMA Extension for Scoping Reviews (PRISMA ScR): Checklist and Explanation. *Ann Intern Med*. 2018;169:467–473. doi: [10.7326/M18-0850](https://doi.org/10.7326/M18-0850).

**Supplementary Table 8:** Literature search strategies per database.

| Database                       | Search Strategy                                                                                                                                                                                                                                                                                                                                                                                                                                                                                                                                                                                                                                                                                                                                                                                                                                                                                                                                                                                                                                                                                                                                                                                                                                                                                                                                                                                                                                                                                                                                                                    |
|--------------------------------|------------------------------------------------------------------------------------------------------------------------------------------------------------------------------------------------------------------------------------------------------------------------------------------------------------------------------------------------------------------------------------------------------------------------------------------------------------------------------------------------------------------------------------------------------------------------------------------------------------------------------------------------------------------------------------------------------------------------------------------------------------------------------------------------------------------------------------------------------------------------------------------------------------------------------------------------------------------------------------------------------------------------------------------------------------------------------------------------------------------------------------------------------------------------------------------------------------------------------------------------------------------------------------------------------------------------------------------------------------------------------------------------------------------------------------------------------------------------------------------------------------------------------------------------------------------------------------|
| Embase.com                     | ('causal inference'/de OR 'causal model'/de OR 'causal modeling'/de OR 'inverse probability weighting'/de OR ((causal NEAR/3 (infern* OR model*)) OR ((causal OR average-treatment* OR individuali*-treatment* OR personali*-treatment*) NEXT/1 (effect*)) OR time-vary*-confound* OR g-computation* OR g-estimation* OR g-formula* OR doubly-robust OR counterfactual* OR (inverse-probabilit* NEAR/3 (weight* OR estimat*)) OR ((marginal-structur* OR structural-nest* OR causal-effect* OR causal-graphic* OR causal-inferen* OR condition*-outcome* OR sequen*-cox*) NEAR/3 (method* OR model*)) OR TAR-Net OR (Treatment*-Agnost* NEAR/3 Representat* NEAR/3 Network*) OR double-machine-learning OR causal-forest* OR deconfoun* OR anchor*-regress* OR x-learner* OR t-learner* OR s-learner* OR q-learning OR q-network OR reinforcement*-learn* OR ((policy OR value) NEXT/1 iteration*) OR temporal-differen* OR actor-critic* OR (Markov NEAR/3 decision NEAR/3 process*)):ab,ti) AND ('intensive care'/exp OR 'intensive care unit'/exp OR 'critically ill patient'/de OR 'critical illness'/de OR 'artificial ventilation'/exp OR 'mechanical ventilator'/exp OR (intensive-care* OR critical-care* OR critical*-ill* OR icu OR ((mechanic* OR artificial*) NEAR/3 ventilat*)):Ab,ti,jt) NOT [conference abstract]/lim AND [english]/lim NOT ('pediatric intensive care unit'/de OR 'neonatal intensive care unit'/de OR child/exp OR pediatrics/exp OR (nicu OR picu OR nicus OR picus OR infant* OR child* OR neonat* OR newborn* OR pediatr* OR paediatr*):ab,ti) |
| Medline ALL                    | (((caus* ADJ3 (infern* OR model*)) OR ((causal OR average-treatment* OR individuali*-treatment* OR personali*-treatment*) ADJ (effect* OR method*)) OR time-vary*-confound* OR g-computation* OR g-estimation* OR g-formula* OR doubly-robust-estimation* OR counterfactual* OR (inverse-probabilit* ADJ3 (weight* OR estimat*)) OR ((marginal-structur* OR structural-nest* OR causal-effect* OR causal-graphic* OR causal-inferen* OR semi-paramet* OR semiparamet* OR fully-paramet*) ADJ3 (method* OR model*)) OR TAR-Net OR (Treatment*-Agnost* ADJ3 Representat* ADJ3 Network*) OR double-machine-learning OR causal-forest* OR deconfoun* OR anchor*-regress* OR x-learner* OR t-learner* OR s-learner* OR q-learning OR q-network OR reinforcement*-learn* OR ((policy OR value) ADJ iteration*) OR temporal-differen* OR actor-critic* OR (Markov ADJ3 decision ADJ3 process*)):ab,ti. OR (RL OR IRL).ti.) AND (exp Intensive Care Units/ OR Critical Illness/ OR exp Respiration, Artificial/ OR exp Ventilators, Mechanical/ OR (intensive-care* OR critical-care* OR critical*-ill* OR icu OR ((mechanic* OR artificial*) ADJ3 ventilat*)):ab,ti,jt) NOT (conference abstract) AND english.la. NOT (Intensive Care Units, Pediatric/de OR Intensive Care Units, Neonatal/de OR exp Child/ OR exp pediatrics/ OR (nicu OR picu OR nicus OR picus OR infant* OR child* OR neonat* OR newborn* OR pediatr* OR paediatr*).ti,ab)                                                                                                                                           |
| Web of Science Core Collection | TS=(((causal NEAR/2 (infern* OR model*)) OR ((causal OR average-treatment* OR individuali*-treatment* OR personali*-treatment*) NEAR/1 (effect*)) OR time-vary*-confound* OR g-computation* OR g-estimation* OR g-formula* OR doubly-robust OR counterfactual* OR (inverse-probabilit* NEAR/2 (weight* OR estimat*)) OR ((marginal-structur* OR structural-nest* OR causal-effect* OR causal-graphic* OR causal-inferen* OR condition*-outcome* OR sequen*-cox*) NEAR/2 (method*                                                                                                                                                                                                                                                                                                                                                                                                                                                                                                                                                                                                                                                                                                                                                                                                                                                                                                                                                                                                                                                                                                   |

|                     |                                                                                                                                                                                                                                                                                                                                                                                                                                                                                                                                                                                                                                                                                                                             |
|---------------------|-----------------------------------------------------------------------------------------------------------------------------------------------------------------------------------------------------------------------------------------------------------------------------------------------------------------------------------------------------------------------------------------------------------------------------------------------------------------------------------------------------------------------------------------------------------------------------------------------------------------------------------------------------------------------------------------------------------------------------|
|                     | OR model*)) OR TAR-Net OR (Treatment*-Agnost* NEAR/2 Representat* NEAR/2 Network*) OR double-machine-learning OR causal-forest* OR deconfoun* OR anchor*-regress* OR x-learner* OR t-learner* OR s-learner* OR q-learning OR q-network OR reinforcement*-learn* OR ((policy OR value) NEAR/1 iteration*) OR temporal-differen* OR actor-critic* OR (Markov NEAR/2 decision NEAR/2 process*)) AND (intensive-care* OR critical-care* OR critical*-ill* OR icu OR ((mechanic* OR artificial*) NEAR/2 ventilat*)) NOT (nicu OR picu OR nicus OR picus OR infant* OR child* OR neonat* OR newborn* OR pediatr* OR paediatr*) AND DT=(Article OR Review OR Letter OR Early Access)                                               |
| Google Scholar      | <p>Searched with 2 different queries:</p> <ul style="list-style-type: none"> <li>"causal inference" "marginal structural models" "g-formula" "structural nested models" "reinforcement learning" "intensive critical care"</li> </ul> <p>Only the <u>first 200</u> results</p> <ul style="list-style-type: none"> <li>"causal inference" "marginal structural models" "g-formula" "structural nested models" "reinforcement learning" intitle:"intensive critical care"</li> </ul>                                                                                                                                                                                                                                          |
| MedRxiv and BioRxiv | Searched via Google with the following query:<br>inurl:medrxiv biorxiv filetype:pdf "causal inference" "marginal structural models" "g-formula" "structural nested models" "reinforcement learning" "intensive critical care"                                                                                                                                                                                                                                                                                                                                                                                                                                                                                               |
| arXiv               | <ul style="list-style-type: none"> <li>Searched via Google with the following query:<br/>inurl:arxiv filetype:pdf "causal inference" "marginal structural models" "g-formula" "structural nested models" "reinforcement learning" "intensive critical care"</li> <li>Additionally, we searched through arXiv using 'advanced search'. We performed ten queries, searching with all possible combinations of the terms ["causal", "reinforcement learning"] and ["intensive care", "critical care", "icu", "mechanical ventilation", "critically ill"], combining these with an 'AND' statement, and selecting 'Abstract' (ie, this will identify articles that have this term in their abstract) for both terms.</li> </ul> |
| ACM Digital Library | <p>We searched through ACM Digital Library using 'advanced search'. Specifically, we combined two 'Search Within Abstract' terms, using the following terms:</p> <ul style="list-style-type: none"> <li>Term 1:<br/>"causal inference" "causal effect" "causal model*" "inverse probability" "individualized treatment" "average treatment" "time \-varying confound*" "g computation" "g \-computation" "g estimation" "g \-estimation" "g formula" "g \-formula" "doubly robust" "doubly \-robust" "marginal structural" "structural nested" "TARNET" "double machine</li> </ul>                                                                                                                                          |

learning" "anchor regression" "x \-learner" "t \-learner" "s \-learner" "q \-  
learning" "q learning" "Q learning" "Q \-learning" "reinforcement learning"  
"temporal difference" "actor \-critic" "actor critic" "Markov decision  
process" "causal forest" "deconfounder"

- Term 2:  
"intensive care" "critical care" "critically ill" "critical ill\*" "icu" "mechanical  
vent\*" "artificial vent\*"

**Supplementary Table 9:** Leading questions for each target trial framework subcomponent considered in the quality of reporting assessment. The analysis plan component is subdivided in specific subcomponents for each used causal inference method. IPTW=inverse probability of treatment weighting, TMLE= targeted minimum loss-based estimation, RL=reinforcement learning.

| <b>Component</b>                            | <b>Subcomponent</b>              | <b>Leading question</b>                                                                                                                                       |
|---------------------------------------------|----------------------------------|---------------------------------------------------------------------------------------------------------------------------------------------------------------|
| <i>Eligibility criteria</i>                 | -                                | Are eligibility criteria for target population described?                                                                                                     |
| <i>Treatment strategies</i>                 | -                                | Are the compared regimes described in such a way that one can think of an analogue randomized trial (ie, target trial)?                                       |
| <i>Outcome</i>                              | -                                | Is the considered patient outcome described?                                                                                                                  |
| <i>Follow-up period</i>                     | time-zero                        | Is the time-zero (baseline) explicitly mentioned or can it reasonably be assumed from the data collection description?                                        |
|                                             | Follow-up                        | Are the start and end of follow-up period explicitly mentioned or can these reasonably be assumed from the data collection description?                       |
|                                             | Time-resolution                  | Is the size of the considered time steps (ie, the time-resolution) explicitly mentioned or can it reasonably be assumed from the data collection description? |
| <i>Analysis plan (RL)</i>                   | Learning scheme                  | Is the learning scheme used to train the RL agent described?                                                                                                  |
|                                             | State space model                | Does the methods description specify whether continuous or categorical state space and on which variables states were based?                                  |
|                                             | Environment model                | Is the modelling of environment described (or clearly not applicable, eg, with model-free learning schemes)?                                                  |
|                                             | Discount factor                  | Is the used discount factor described?                                                                                                                        |
|                                             | Outcome estimator                | Is the model used to estimate the outcome described? (eg, logistic regression)                                                                                |
|                                             | Outcome predictors               | Are variables/features used to model the outcome described (including both time-fixed and time-varying variables)?                                            |
|                                             | Confounders estimators           | Is the model used to estimate the confounders described? (eg, logistic regression)                                                                            |
| <i>Analysis plan (parametric G formula)</i> | Confounders predictors           | Are variables/features used to model the confounders described?                                                                                               |
|                                             | Method to evaluate the G formula | Is the method to evaluate the G formula described? (eg, Monte-Carlo sampling)                                                                                 |



*Analysis plan  
(IPTW/TMLE)*

|                             |                                                                                                                             |
|-----------------------------|-----------------------------------------------------------------------------------------------------------------------------|
| Propensity score estimator  | Is the model used to estimate the propensity score described? (eg, logistic regression)                                     |
| Propensity score predictors | Are variables/features used to model the propensity score described (including both time-fixed and time-varying variables)? |

## Supplementary Figures

**Supplementary Figure 1:** Figure S1: Bar chart representing the number of published articles using the different (a) modelling strategies and (b) studied treatment regimes over the years. IPTW=inverse probability-of-treatment weighting, RL=reinforcement learning, TMLE=targeted minimum loss- based estimation.

a

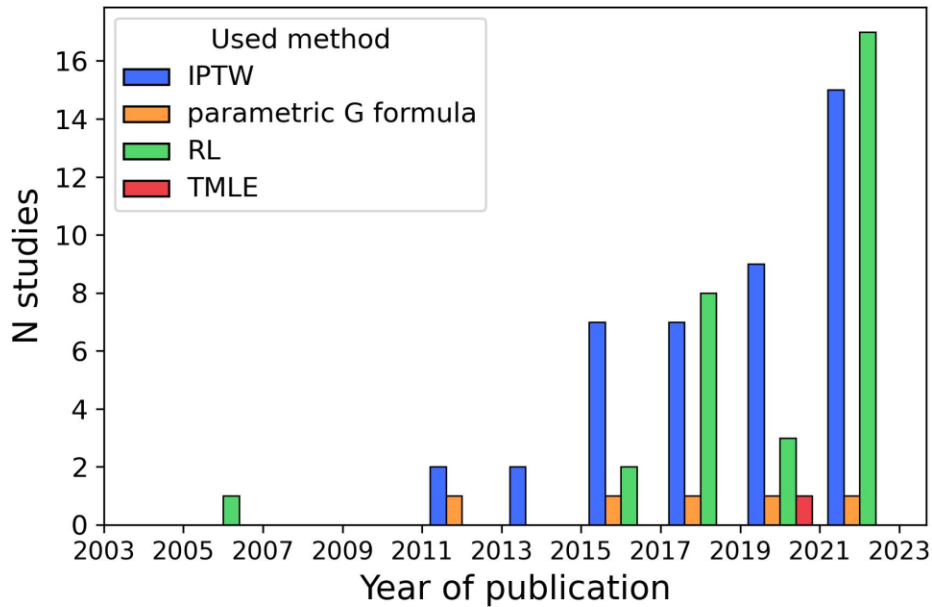

b

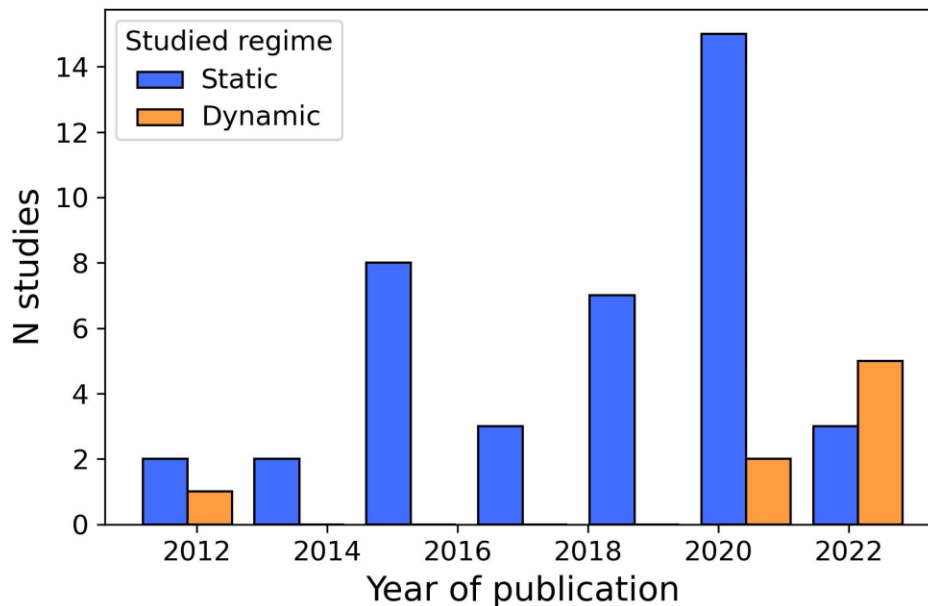

**Supplementary Figure 2:** Nested pie chart representing the off-policy evaluation (OPE) methods used in the reinforcement learning studies that used real patient data (n=26). IS=Importance sampling, MB=Model-based, DR=Doubly robust.

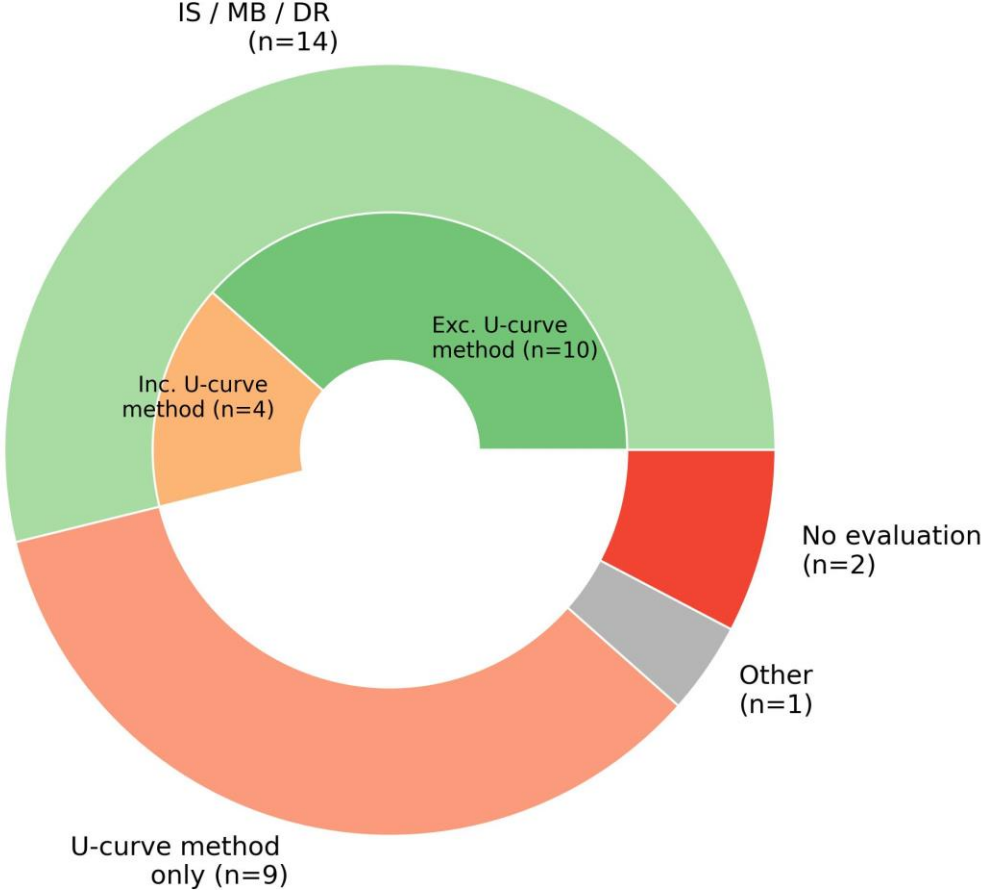

**Supplementary Figure 3:** Reporting of the target trial components in studies using inverse-probability-of-treatment weighting or targeted minimum loss-based estimation (n=43).

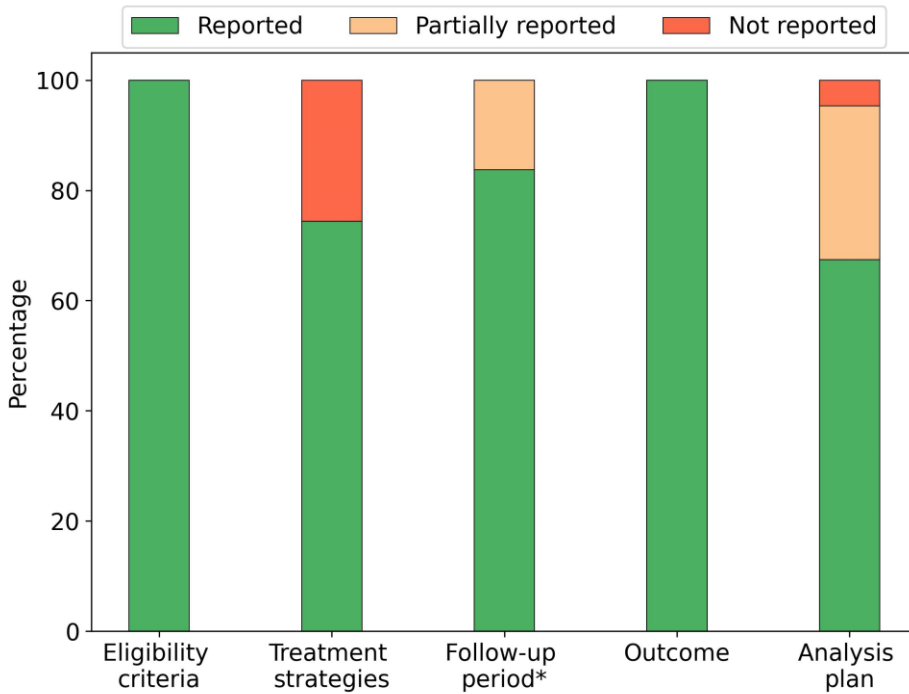

**Supplementary Figure 4:** Reporting of the target trial components in studies using the parametric G formula (n=5).

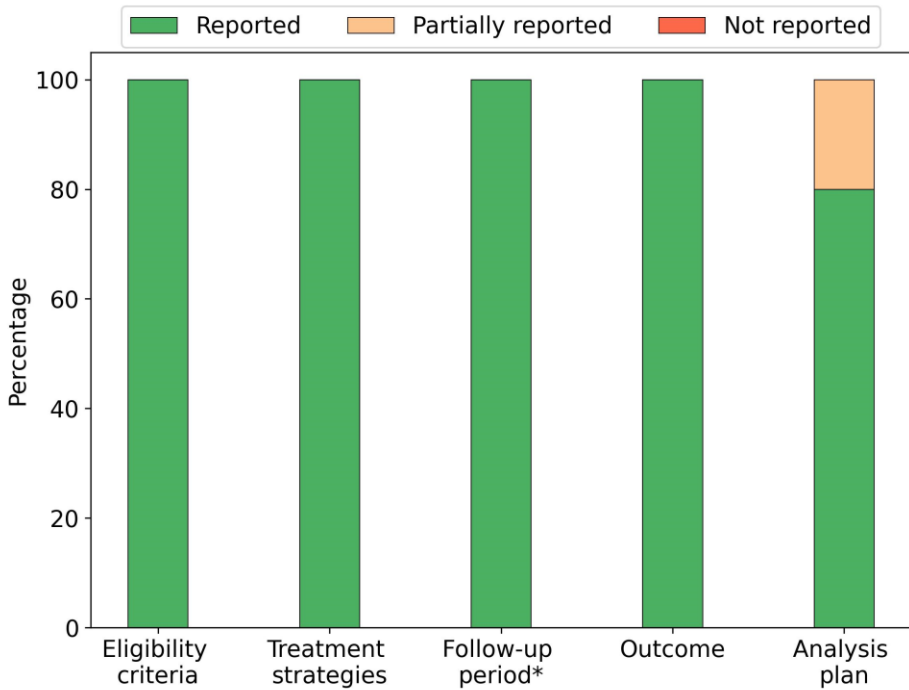

**Supplementary Figure 5:** Reporting of the target trial components in studies using reinforcement learning (n=28). \*For the follow-up component, the studies that used simulated patient data (n=5) are not taken into account.

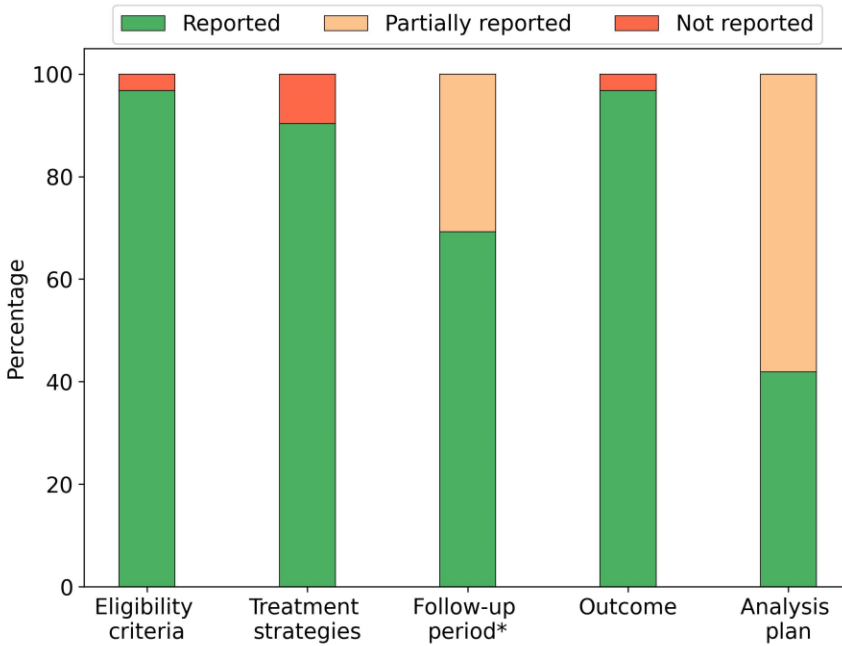

**Supplementary Figure 6:** Reporting of assumptions in the studies using inverse-probability-of-treatment weighting or targeted minimum loss-based estimation (n=43). Level 1=assumption not mentioned, level 2=assumption mentioned, level 3=attempt to check for potential violations of the assumption reported.

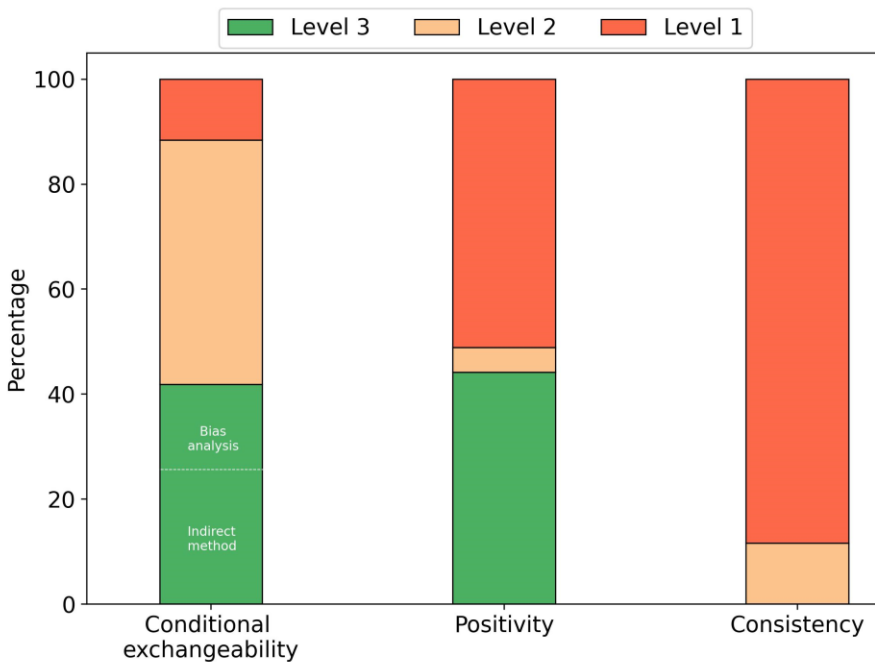

**Supplementary Figure 7:** Reporting of assumptions in the studies using the parametric G formula (n=5). Level 1=assumption not mentioned, level 2=assumption mentioned, level 3=attempt to check for potential violations of the assumption reported.

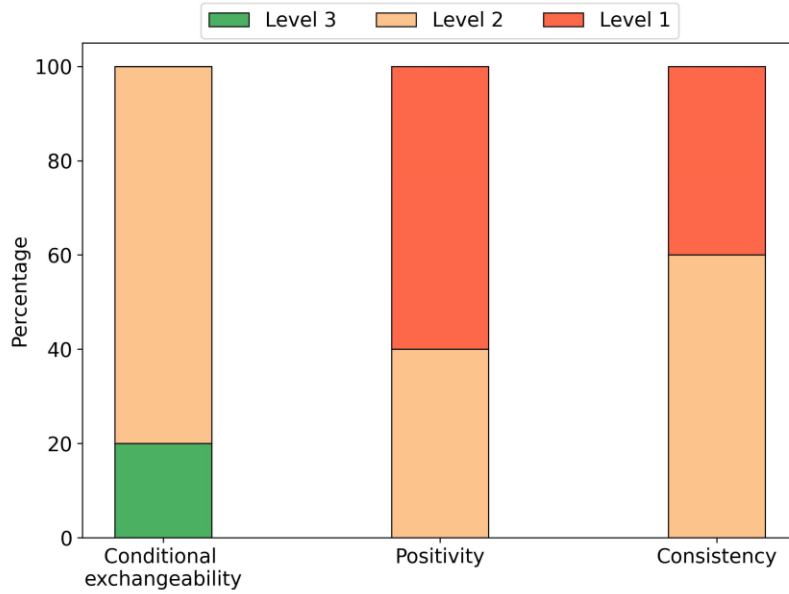

**Supplementary Figure 8:** Reporting of assumptions in the studies using reinforcement learning (n=31). Level 1=assumption not mentioned, level 2=assumption mentioned, level 3=attempt to check for potential violations of the assumption reported.

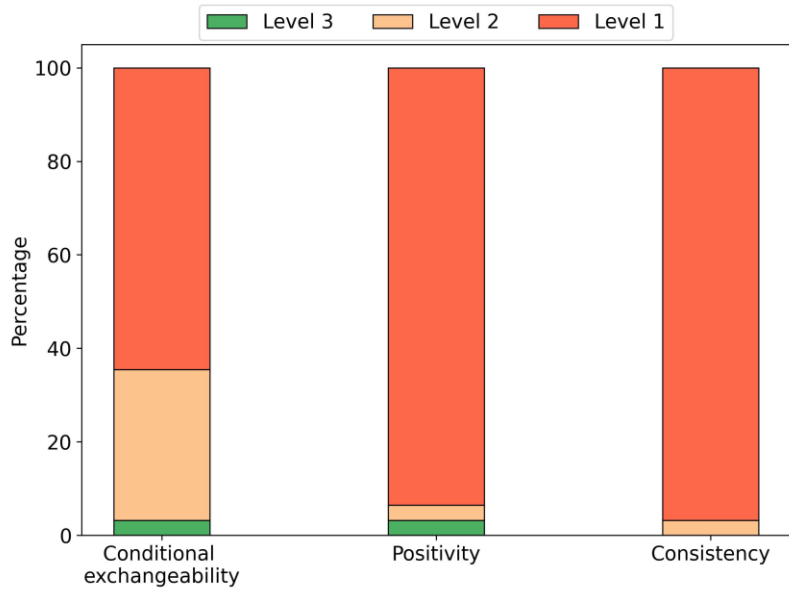

## Supplementary References

1. Agodi, A. *et al.* Preventable proportion of intubation-associated pneumonia: Role of adherence to a care bundle. *PLoS One* **12**, (2017).
2. Althoff, M. D. *et al.* Noninvasive Ventilation Use in Critically Ill Patients with Acute Asthma Exacerbations. *Am. J. Respir. Crit. Care Med.* **202**, 1520–1530 (2020).
3. Amer, M. *et al.* Clinical characteristics and outcomes of critically ill mechanically ventilated COVID-19 patients receiving interleukin-6 receptor antagonists and corticosteroid therapy: a preliminary report from a multinational registry. *Eur. J. Med. Res.* **26**, 1–12 (2021).
4. Arabi, Y. M. *et al.* Corticosteroid therapy for critically ill patients with middle east respiratory syndrome. *Am. J. Respir. Crit. Care Med.* **197**, 757–767 (2018).
5. Arabi, Y. M. *et al.* Ribavirin and Interferon Therapy for Critically Ill Patients with Middle East Respiratory Syndrome: A Multicenter Observational Study. *Clin. Infect. Dis.* **70**, 1837–1844 (2020).
6. Arnaud, F. C. D. S. & Libório, A. B. Attributable nephrotoxicity of vancomycin in critically ill patients: A marginal structural model study. *J. Antimicrob. Chemother.* **75**, 1031–1037 (2020).
7. Bailly, S. *et al.* Failure of empirical systemic antifungal therapy in mechanically ventilated critically ill patients. *Am. J. Respir. Crit. Care Med.* **191**, 1139–1146 (2015).
8. Bekaert, M. *et al.* Attributable mortality of ventilator-associated pneumonia: A reappraisal using causal analysis. *Am J Respir Crit Care Med* **184**, 1133–1139 (2011).
9. Bologheanu, R. *et al.* Development of a Reinforcement Learning Algorithm to Optimize Corticosteroid Therapy in Critically Ill Patients with Sepsis. *J. Clin. Med.* **12**, (2023).
10. Chen, H. *et al.* Corticosteroid Therapy Is Associated With Improved Outcome in Critically Ill Patients With COVID-19 With Hyperinflammatory Phenotype. *Chest* **159**, 1793–1802 (2021).
11. Cheng, L.-F., Prasad, N. & Engelhardt, B. E. An Optimal Policy for Patient Laboratory Tests in Intensive Care Units. *Pac. Symp. Biocomput.* **24**, 320–331 (2019).
12. De Bus, L. *et al.* Antimicrobial de-escalation in the critically ill patient and assessment of clinical cure: the DIANA study. *Intensive Care Med.* **46**, 1404–1417 (2020).
13. Delaney, J. W. *et al.* The influence of corticosteroid treatment on the outcome of influenza A(H1N1pdm09)-related critical illness. *Crit. Care* **20**, (2016).
14. Dupuis, C. *et al.* Effect of transfusion on mortality and other adverse events among critically ill septic patients: An observational study using a marginal structural Cox model. *Crit. Care Med.* **45**, 1972–1980 (2017).
15. Eghbali, N., Alhanai, T. & Ghassemi, M. M. Patient-Specific Sedation Management via Deep Reinforcement Learning. *Front. Digit. Heal.* **3**, 608893 (2021).
16. Esperatti, M. *et al.* Validation of Predictors of Adverse Outcomes in Hospital-Acquired Pneumonia in the ICU. *Crit. Care Med.* **41**, 2151–2161 (2013).
17. Frencken, J. F. *et al.* Associations between enteral colonization with gram-negative bacteria and intensive care unit-acquired infections and colonization of the respiratory tract. *Clin. Infect. Dis.* **66**, 497–503 (2018).
18. Guo, H., Li, J., Liu, H. & He, J. Learning dynamic treatment strategies for coronary heart diseases

- by artificial intelligence: real-world data-driven study. *BMC Med. Inform. Decis. Mak.* **22**, 1–16 (2022).
19. Huang, S. *et al.* Effectiveness of sodium bicarbonate infusion on mortality for elderly septic patients with acute metabolic acidosis. *Front. Pharmacol.* **13**, 1–8 (2022).
  20. Jeter, R., Lehman, L.-W., Josef, C., Shashikumar, S. & Nemati, S. *Learning to Treat Hypotensive Episodes in Sepsis Patients Using a Counterfactual Reasoning Framework*. Preprint at <https://www.medrxiv.org/content/early/2021/03/07/2021.03.03.21252863> (2021) doi:10.1101/2021.03.03.21252863.
  21. Kaushik, P., Kummetha, S., Moodley, P. & Bapi, R. S. *A conservative q-learning approach for handling distribution shift in sepsis treatment strategies*. Preprint at <https://arxiv.org/abs/2203.13884> (2022).
  22. Khanal, N. *et al.* Comparison of outcomes by modality for critically ill patients requiring renal replacement therapy: A single-centre cohort study adjusting for time-varying illness severity and modality exposure. *Anaesth. Intensive Care* **40**, 260–268 (2012).
  23. Klein Klouwenberg, P. M. *et al.* The attributable mortality of delirium in critically ill patients: prospective cohort study. *BMJ* **349**, g6652 (2014).
  24. Komorowski, M., Celi, L. A., Badawi, O., Gordon, A. C. & Faisal, A. A. The Artificial Intelligence Clinician learns optimal treatment strategies for sepsis in intensive care. *Nat Med* **24**, 1716–1720 (2018).
  25. Kondrup, F. *et al.* Towards Safe Mechanical Ventilation Treatment Using Deep Offline Reinforcement Learning. *Proc. AAAI Conf. Artif. Intell.* **37**, 15696–15702 (2023).
  26. Li, X., Klompas, M., Menchaca, J. T. & Young, J. G. Effects of daily treatment with acid suppressants for stress ulcer prophylaxis on risk of ventilator-Associated events. *Infect Control Hosp Epidemiol* **41**, 187–193 (2019).
  27. Li, Y. *et al.* Corticosteroid therapy in critically ill patients with COVID-19: a multicenter, retrospective study. *Crit. Care* **24**, (2020).
  28. Libório, A. B., Barbosa, M. L., Sá, V. B. & Leite, T. T. Impact of loop diuretics on critically ill patients with a positive fluid balance. *Anaesthesia* **75**, e134–e142 (2020).
  29. Lin, R., Stanley, M. D., Ghassemi, M. M. & Nemati, S. A Deep Deterministic Policy Gradient Approach to Medication Dosing and Surveillance in the ICU. *Conf Proc IEEE Eng Med Biol Soc.* (2018) doi:10.1109/EMBC.2018.8513203.A.
  30. Liu, Q., Henry, K., Xu, Y. & Saria, S. Using Causal Inference to Estimate What-if Outcomes for Targeting Treatments. in *30th Conference on Neural Information Processing Systems* (2016).
  31. Lopez-Martinez, D. *et al.* Deep Reinforcement Learning for Optimal Critical Care Pain Management with Morphine using Dueling Double-Deep Q Networks. *Conf. Proc. ... Annu. Int. Conf. IEEE Eng. Med. Biol. Soc. IEEE Eng. Med. Biol. Soc. Annu. Conf.* **2019**, 3960–3963 (2019).
  32. Martucci, G. *et al.* Transfusion practice in patients receiving VV ECMO (PROTECMO): a prospective, multicentre, observational study. *Lancet. Respir. Med.* **11**, 245–255 (2023).
  33. Mecklenburg, A. *et al.* Impact of therapeutic hypothermia on bleeding events in adult patients treated with extracorporeal life support peri-cardiac arrest. *J. Crit. Care* **62**, 12–18 (2021).
  34. Mollura, M., Drudi, C., Lehman, L.-W. & Barbieri, R. A Reinforcement Learning Application for Optimal Fluid and Vasopressor Interventions in Septic ICU Patients. in *2022 44th Annual*



- International Conference of the IEEE Engineering in Medicine & Biology Society (EMBC)* 321–324 (2022). doi:10.1109/EMBC48229.2022.9871055.
35. Moromizato, T., Sakaniwa, R., Tokuda, Y., Taniguchi, K. & Shibuya, K. Intravenous methylprednisolone pulse therapy and the risk of in-hospital mortality among acute COVID-19 patients: Nationwide clinical cohort study. *Crit. Care* **27**, 1–11 (2023).
  36. Morzywołek, P. *et al.* Timing of dialysis in acute kidney injury using routinely collected data and dynamic treatment regimes. *Crit. Care* **26**, 365 (2022).
  37. Muriel, A. *et al.* Impact of sedation and analgesia during noninvasive positive pressure ventilation on outcome: a marginal structural model causal analysis. *Intensive Care Med* **41**, 1586–1600 (2015).
  38. Nemati, S., Ghassemi, M. M. & Clifford, G. D. Optimal medication dosing from suboptimal clinical examples: a deep reinforcement learning approach. *Annu. Int. Conf. IEEE Eng. Med. Biol. Soc.* 2978–2981 (2016) doi:10.1109/EMBC.2016.7591355.
  39. Ohbe, H. *et al.* Early enteral nutrition for cardiogenic or obstructive shock requiring venoarterial extracorporeal membrane oxygenation: a nationwide inpatient database study. *Intensive Care Med.* **44**, 1258–1265 (2018).
  40. Ong, D. S. Y. *et al.* Epidemiology, management, and risk-adjusted mortality of ICU-acquired enterococcal bacteremia. *Clin. Infect. Dis.* **61**, 1413–1420 (2015).
  41. Ong, D. S. Y. *et al.* Cytomegalovirus reactivation and mortality in patients with acute respiratory distress syndrome. *Intensive Care Med.* **42**, 333–341 (2016).
  42. Padmanabhan, R., Meskin, N. & Haddad, W. M. Closed-loop control of anesthesia and mean arterial pressure using reinforcement learning. *Biomed. Signal Process. Control* **22**, 54–64 (2015).
  43. Padmanabhan, R., Meskin, N. & Haddad, W. M. Reinforcement learning-based control for combined infusion of sedatives and analgesics. in *2017 4th International Conference on Control, Decision and Information Technologies (CoDIT)* 505–509 (IEEE, 2017).
  44. Peine, A. *et al.* Development and validation of a reinforcement learning algorithm to dynamically optimize mechanical ventilation in critical care. *npj Digit Med* **4**, (2021).
  45. Peng, C. *et al.* Impact of Early Tracheostomy on Clinical Outcomes in Trauma Patients Admitted the to Intensive Care Unit: A Retrospective Causal Analysis. *J. Cardiothorac. Vasc. Anesth.* (2022) doi:10.1053/j.jvca.2022.12.022.
  46. Peng, X. *et al.* Improving Sepsis Treatment Strategies by Combining Deep and Kernel-Based Reinforcement Learning. *AMIA ... Annu. Symp. proceedings. AMIA Symp.* **2018**, 887–896 (2018).
  47. Petersen, B. K. *et al.* Deep Reinforcement Learning and Simulation as a Path Toward Precision Medicine. *J. Comput. Biol. a J. Comput. Mol. cell Biol.* **26**, 597–604 (2019).
  48. Pisani, M. A., Araujo, K. L. B. & Murphy, T. E. Association of cumulative dose of haloperidol with next-day delirium in older medical ICU patients. *Crit. Care Med.* **43**, 996–1002 (2015).
  49. Pouwels, K. B. *et al.* Does appropriate empiric antibiotic therapy modify intensive care unit-acquired Enterobacteriaceae bacteraemia mortality and discharge? *J. Hosp. Infect.* **96**, 23–28 (2017).
  50. Pouwels, K. B. *et al.* Intensive care unit (ICU)-acquired bacteraemia and ICU mortality and discharge: addressing time-varying confounding using appropriate methodology. *J. Hosp. Infect.* **99**, 42–47 (2018).

51. Pouwels, K. B. *et al.* Estimating the Effect of Healthcare-Associated Infections on Excess Length of Hospital Stay Using Inverse Probability-Weighted Survival Curves. *Clin. Infect. Dis.* **71**, E415–E420 (2020).
52. Prasad, N., Cheng, L.-F., Chivers, C., Draugelis, M. & Engelhardt, B. E. *A reinforcement learning approach to weaning of mechanical ventilation in intensive care units. Preprint at <https://arxiv.org/abs/1704.06300>* (2017).
53. Prasad, N. *et al.* Guiding Efficient, Effective, and Patient-Oriented Electrolyte Replacement in Critical Care: An Artificial Intelligence Reinforcement Learning Approach. *J. Pers. Med.* **12**, (2022).
54. Raghu, A., Komorowski, M. & Celi, L. A. Continuous state-space models for optimal sepsis treatment: a deep reinforcement learning approach. in *Machine Learning for Healthcare Conference* (2017).
55. Raghu, A., Komorowski, M., Ahmed, I. & Celi, L. *Deep reinforcement learning for sepsis treatment. Preprint at <https://arxiv.org/abs/1711.09602>* (2017).
56. Ribba, B., Bräm, D. S., Baverel, P. G. & Peck, R. W. Model enhanced reinforcement learning to enable precision dosing: A theoretical case study with dosing of propofol. *CPT Pharmacometrics Syst. Pharmacol.* **11**, 1497–1510 (2022).
57. Roggeveen, L. *et al.* Transatlantic transferability of a new reinforcement learning model for optimizing haemodynamic treatment for critically ill patients with sepsis. *Artif. Intell. Med.* **112**, (2021).
58. Shahn, Z., Shapiro, N. I., Tyler, P. D., Talmor, D. & Lehman, L.-W. H. Fluid-limiting treatment strategies among sepsis patients in the ICU: A retrospective causal analysis. *Crit. Care* **24**, (2020).
59. Shahn, Z., Lehman, L.-W. H., Mark, R. G., Talmor, D. & Bose, S. Delaying initiation of diuretics in critically ill patients with recent vasopressor use and high positive fluid balance. *Br. J. Anaesth.* **127**, 569–576 (2021).
60. Shahn, Z. *et al.* Effects of aggressive and conservative strategies for mechanical ventilation liberation. *J. Crit. Care* **76**, 154275 (2023).
61. Sinzinger, E. D. & Moore, B. Sedation of simulated ICU patients using reinforcement learning based control. *Int. J. Artif. Intell. Tools* **14**, 137–156 (2005).
62. Steen, J. *et al.* Attributable mortality of ventilator-associated pneumonia replicating findings, revisiting methods. *Ann. Am. Thorac. Soc.* **18**, 830–837 (2021).
63. Su, L. *et al.* Establishment and Implementation of Potential Fluid Therapy Balance Strategies for ICU Sepsis Patients Based on Reinforcement Learning. *Front. Med.* **9**, 1–14 (2022).
64. Tacquard, C. *et al.* Impact of High-Dose Prophylactic Anticoagulation in Critically Ill Patients With COVID-19 Pneumonia. *Chest* **159**, 2417–2427 (2021).
65. Torres, L. K. *et al.* Attributable mortality of acute respiratory distress syndrome: A systematic review, meta-analysis and survival analysis using targeted minimum loss-based estimation. *Thorax* (2021) doi:10.1136/thoraxjnl-2020-215950.
66. Truche, A.-S. *et al.* Continuous renal replacement therapy versus intermittent hemodialysis in intensive care patients: impact on mortality and renal recovery. *Intensive Care Med.* **42**, 1408–1417 (2016).
67. Urner, M. *et al.* Venovenous extracorporeal membrane oxygenation in patients with acute covid-19 associated respiratory failure: comparative effectiveness study. *BMJ* **377**, 1–9 (2022).

68. Wang, W. *et al.* Estimating the Causal Effect of Low Tidal Volume Ventilation on Survival in Patients with Acute Lung Injury. *J R Stat Soc Ser C Appl Stat* **60**, 475–496 (2011).
69. Wang, Y., Zhao, Y. & Petzold, L. Predicting the need for blood transfusion in intensive care units with reinforcement learning. in *Proceedings of the 13th ACM International Conference on Bioinformatics, Computational Biology and Health Informatics* 1–10 (2022).
70. Wang, Z., Zhao, H., Ren, P., Zhou, Y. & Sheng, M. Learning Optimal Treatment Strategies for Sepsis Using Offline Reinforcement Learning in Continuous Space. in *International Conference on Health Information Science* 113–124 (Springer, 2022).
71. Weng, W.-H., Gao, M., He, Z., Yan, S. & Szolovits, P. *Representation and reinforcement learning for personalized glycemic control in septic patients. Preprint at <https://arxiv.org/abs/1712.00654>* (2017).
72. Yang, Z. *et al.* Optimization of Dry Weight Assessment in Hemodialysis Patients via Reinforcement Learning. *IEEE J. Biomed. Heal. Informatics* **26**, 4880–4891 (2022).
73. Yarnell, C. J. *et al.* Oxygenation thresholds for invasive ventilation in hypoxemic respiratory failure: a target trial emulation in two cohorts. *Crit. Care* **27**, 67 (2023).
74. Zhang, L. *et al.* The Role of Glucocorticoids in the Treatment of ARDS: A Multicenter Retrospective Study Based on the eICU Collaborative Research Database. *Front. Med.* **8**, (2021).
75. Zhang, Q., Wang, J., Liu, G. & Zhang, W. Artificial intelligence can use physiological parameters to optimize treatment strategies and predict clinical deterioration of sepsis in ICU. *Physiol. Meas.* **44**, (2023).
76. Zhang, R. *et al.* The Effect of Loop Diuretics on 28-Day Mortality in Patients With Acute Respiratory Distress Syndrome. *Front. Med.* **8**, (2021).
77. Zhang, Z., Zhu, C., Mo, L. & Hong, Y. Effectiveness of sodium bicarbonate infusion on mortality in septic patients with metabolic acidosis. *Intensive Care Med.* **44**, 1888–1895 (2018).
78. Zhang, Z., Mo, L., Ho, K. M. & Hong, Y. Association between the use of sodium bicarbonate and mortality in acute kidney injury using marginal structural COx model. *Crit. Care Med.* **47**, 1402–1408 (2019).
79. Zheng, H., Zhu, J., Xie, W. & Zhong, J. Reinforcement learning assisted oxygen therapy for COVID-19 patients under intensive care. *BMC Med Inf Decis Mak* **21**, 350 (2021).
